# Supplementary material
Source: PubMed Central journal article supplement (PMC3538478)
Supplement: mmc1.pdf [file mmc1.pdf]

**eTable. Standard Disease Activity Assessments\***

| <b>Assessment</b>                                | <b>Units</b>  | <b>Frequency</b> |
|--------------------------------------------------|---------------|------------------|
| <i>Patient-Derived Data</i>                      |               |                  |
| Pain visual analog scale                         | 0 – 100 mm    | 3 – 6 mo         |
| Patient global assessment                        | 0 – 100 mm    | 3 – 6 mo         |
| Health Assessment Questionnaire disability index | 0 – 3         | 6 – 12 mo        |
| <i>Provider- or Lab-Derived Data</i>             |               |                  |
| Evaluator global assessment                      | 0 – 100 mm    | 3 – 6 mo         |
| Tender joint count                               | 0 – 28        | 3 – 6 mo         |
| Swollen joint count                              | 0 – 28        | 3 – 6 mo         |
| C-reactive protein                               | mg/l or mg/dl | 3 – 6 mo         |
| <i>Composite Disease Activity Measures</i>       |               |                  |
| Simplified Disease Activity Index (SDAI)         | 0 – 86        | 3 – 6 mo         |
| Clinical Disease Activity Index (CDAI)           | 0 – 76        | 3 – 6 mo         |

\*In order to define the absolute disease activity level at diagnosis and to define clinical response over time, we record standard disease activity assessments at baseline and follow-up visits. The frequency will depend on the particular assessment. In example, physical function need only be monitored every 6 months whereas a composite disease activity score should be monitored at each visit. The particular instrument used will depend on whether the C-reactive protein is obtained; in this case, we use the SDAI. Otherwise, we use the CDAI. We record these assessments into the electronic medical record in a designated location to facilitate disease monitoring over time. Abbreviations: CDAI = Clinical Disease Activity Index; SDAI = Simplified Disease Activity Index.
